# Supplementary material for: Jieduan-Niwan Formula Reduces Liver Apoptosis in a Rat Model of Acute-on-Chronic Liver Failure by Regulating the E2F1-Mediated Intrinsic Apoptosis Pathway
Source: Hindawi journal article supplement (doi:10.1155/2019/8108503), 2019-11-11
Supplement: f1 [file 8108503.f1.pdf]

Supplementary material.

1. To confirm the successful development of liver cirrhosis, we performed Masson's trichrome staining of liver biopsy. It showed that collagen fibers formed fibrous septa and disordered lobular structure.

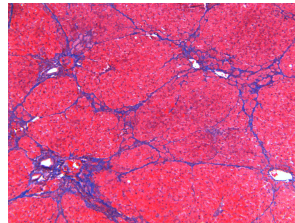

Figure 1: Masson's trichrome staining in liver cirrhosis model group (magnification  $\times 200$ ).

2. Primer sequence used for real-time PCR.

Table 1: Primer sequence used in real-time PCR detection and analysis.

| Gene symbol | Primers                                                    | Amplicon (bp) |
|-------------|------------------------------------------------------------|---------------|
| casp3       | F:ACTGGAAAGCCGAAACTCTTCATCA<br>R: GGAAGTCGGCCTCCACTGGTATC  | 127           |
| p53         | F: TCACCTCCACACCTCCACCT<br>R: CCTGTCGTCCAGATACTCAGCATA     | 188           |
| casp7       | F: TATCAACGACACCGACGCTAAT<br>R: GCCTGGAACCGTGGAGTAAG       | 82            |
| P14ARF      | F: GCTCTCCTGCTCTCCTATGGT<br>R: CAGAAGTTATGCCTGTCGGTGA      | 269           |
| Bcl-2       | F: GGGCTACGAGTGGGATACTGGAG<br>R: CGGGCGTTCGGTTGCTCT        | 101           |
| E2F1        | F: AACGGAGGCTGGATCTGGAA<br>R: ATTCTTGGAATCTTGGCAATGAG      | 293           |
| Apaf-1      | F: GCTCTCCTCTCGTCGTGTCT<br>R: GTCTGTGTAGTAGTCCTTGATGTCT    | 200           |
| MCL1        | F: GCCAAACACTTAAAGAGCATAAACC<br>R: CCGCTTCGTCCTTACAAGAAC   | 87            |
| Casp6       | F: AGAAGAACTACTGCTCAAGATTCAC<br>R: CCAACCAGGCTCTGACACTT    | 180           |
| P73         | F: TGTCGCCAACCTTATCAAGCTC<br>R: GCATGGCCAGCTCTGTTCTC       | 139           |
| PCNA        | F: CATATTGGAGATGCTGTGGTGAT<br>R: CATACTGAGTGTTACTGTAGGAGAC | 231           |
| Actin       | F: GGAGATTACTGCCCTGGCTCCTA                                 | 150           |

### 3. Protein expression data for each protein.

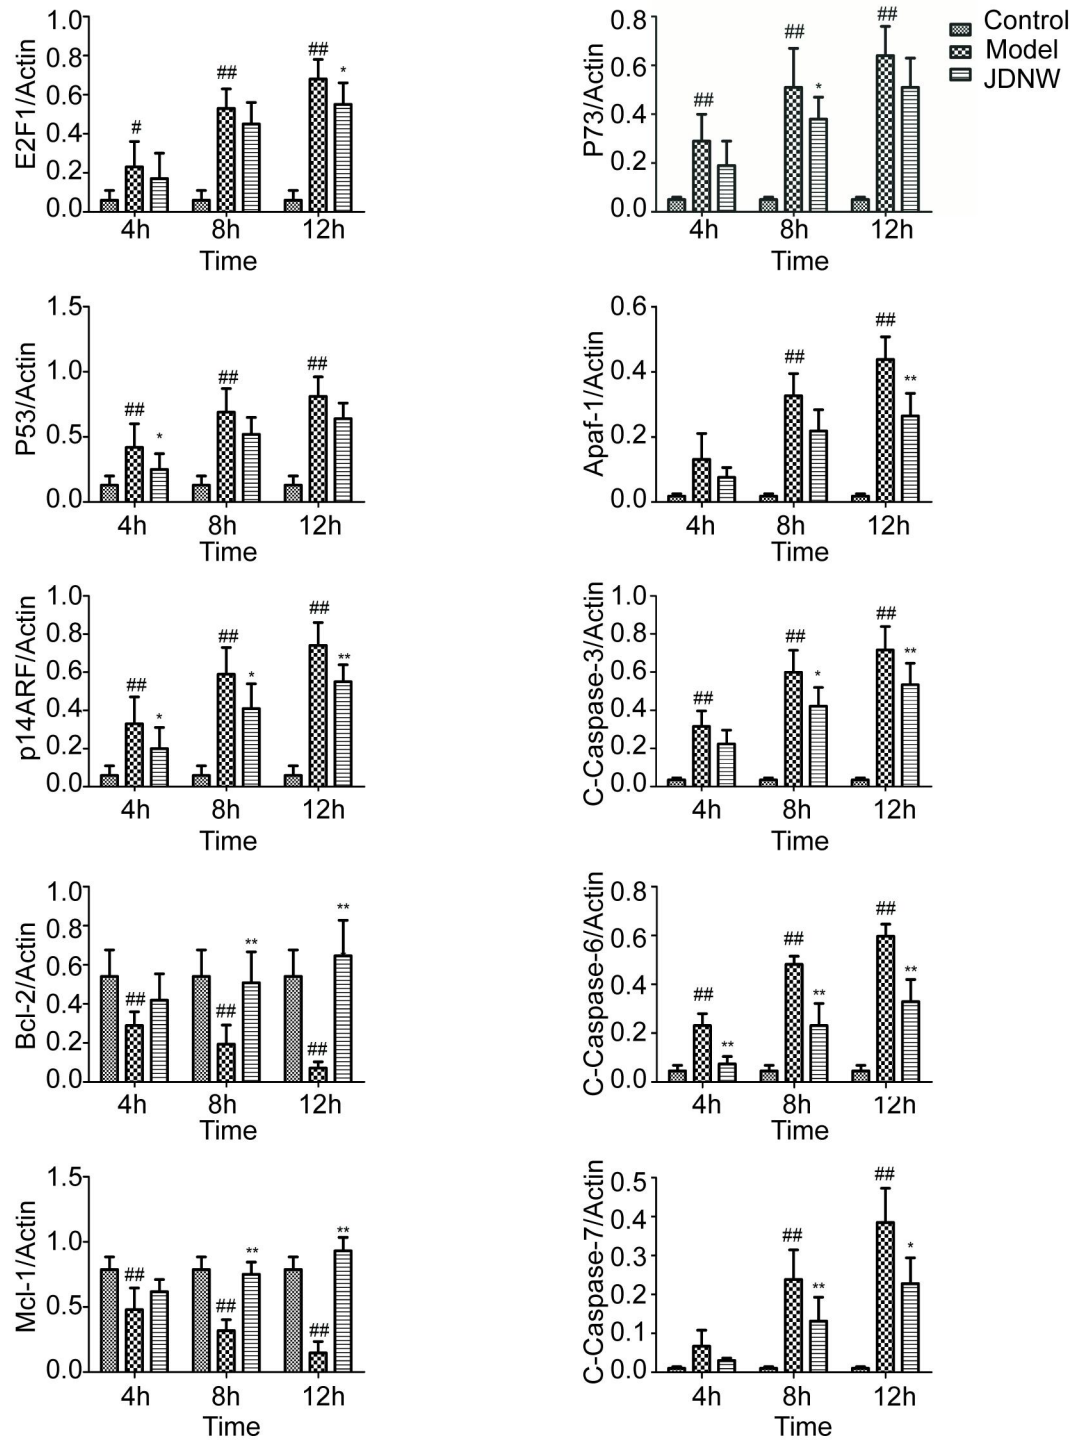

Figure 2: Effect of JDNW on the expression of E2F1, P53, P73, p14ARF, Apaf-1, Cleaved Caspase-3, 6 and 7, and Bcl-2 and Mcl-1 protein expression levels in the liver tissues of ACLF model rats. <sup>#</sup> $P < 0.05$ ; <sup>##</sup> $P < 0.01$ , vs. control group. <sup>\*</sup> $P < 0.05$ ; <sup>\*\*</sup> $P < 0.01$ , vs. model group.
